# Supplementary material for: Unusual partner radical trimer formation in a host complex of cucurbit[8]uril, ruthenium(ii) tris-bipyridine linked phenol and methyl viologen
Source: Royal Society of Chemistry journal article supplement (doi:10.1039/b910575a), 2009-11-13
Supplement: b910575a.pdf [file b910575a.pdf]

## Unusual partner radical trimer formation in a host complex of cucurbit[8]uril, ruthenium(II) *tris*-bipyridine linked phenol and methylviologen

Shiguo Sun,<sup>[a,b]</sup> Samir Andersson,<sup>[a]</sup> Rong Zhang,<sup>[b]</sup> and Licheng Sun<sup>\*[a]</sup>

<sup>a</sup>*School of Chemical Science and Engineering, Department of Chemistry, Royal Institute of Technology (KTH), Teknikringen 30, 100 44 Stockholm, Sweden.*

<sup>b</sup>*State Key Laboratory of Fine Chemicals, DUT–KTH Joint Education and Research Center on Molecular Device, Dalian University of Technology (DUT), ZhongShan Road 158-40, 116012 Dalian, China.*

### Supporting information

#### Synthesis

**4-(Chloromethyl)phenyl acetate.** This compound was prepared according to a literature procedure [Taylor L. D., Grasshoff J. M., Pluhar M. *J. Org. Chem.* 1978, **43**, 1197]. <sup>1</sup>H NMR (400 MHz, CDCl<sub>3</sub>), δ 2.31 (s, 3H, CH<sub>3</sub>COOPh-), 4.57 (s, 2H, -PhCH<sub>2</sub>Cl), 7.10 (d, *J* = 8.8 Hz, 2H, Ph-H), 7.40 (d, *J* = 8.8 Hz, 2H, Ph-H).

**4-(ethyl-phenol)-4'-methyl-2,2'-bipyridine.** To a solution of 4,4'-dimethyl-2,2'-bipyridine (2.5 g, 13.5 mmol) in THF (50 mL) was added a solution of freshly prepared LDA (2 mL of diisopropylamine, 8.1 mL of 1.6 M *n*-butyllithium in 10 mL of THF maintained at 0 °C) in drop wise under N<sub>2</sub> at 0 °C, the resulting dark brown solution was stirred for 1h, 4-(Chloromethyl)phenyl acetate (20 mmol, 3.69 g) was added quickly, then the ice bath was removed and the solution was allowed to warm to room temperature. After 3 h, the reaction was quenched by the addition of 100 mL of phosphate buffer (pH = 7.0). The solution was extracted with 3 × 50 mL of CH<sub>2</sub>Cl<sub>2</sub>, the combined CH<sub>2</sub>Cl<sub>2</sub> layers were dried (Na<sub>2</sub>SO<sub>4</sub>) and evaporated to a yellow residual oil. The crude product was purified by column chromatography on silica gel, eluting first with CH<sub>2</sub>Cl<sub>2</sub>, followed by 10% acetone/CH<sub>2</sub>Cl<sub>2</sub>, yielded 3.1 g of the desired compound (82.5%). <sup>1</sup>H NMR (CDCl<sub>3</sub>, ppm) δ 2.37 (s, 3H, CH<sub>3</sub>), 2.75-2.84 (m, 4H, CH<sub>2</sub>), 6.73-6.75 (d, *J* = 8.4 Hz, 2H,

Ph-H), 6.89-6.92 (d,  $J = 8.4$  Hz, 2H, Ph-H), 7.03-7.05 (dd,  $J = 4.8$  Hz, 1.2 Hz, 1H, bpy-H), 7.12-7.13 (dd,  $J = 4.8$  Hz, 1H, bpy-H), 8.18 (s, 2H, bpy-H), 8.49-8.53 (m, 2H, bpy-H).

**[Ru(bpy)<sub>2</sub>(4-(4-ethyl-phenol)-4'-methyl-2,2'-bipyridine)](Cl)<sub>2</sub> (1).** Compounds 4-(4-ethyl-phenol)-4'-methyl-2,2'-bipyridine (87 mg, 0.3 mmol) and *cis*-Ru(bpy)<sub>2</sub>Cl<sub>2</sub>·2H<sub>2</sub>O (141 mg, 0.27 mmol) were added to the solution of 40 ml of 50% ethanol/water (v/v). The reaction flask was wrapped with aluminum foil and refluxed under N<sub>2</sub> atmosphere for 4 h, an orange brown solution was obtained. After removing the solvent by rotary evaporation, the crude product was purified by column chromatography on silica gel (eluent CH<sub>3</sub>CN/H<sub>2</sub>O/saturated aqueous KNO<sub>3</sub>, 10/2/1, v/v/v). Excess KNO<sub>3</sub> and the solvent were removed; the residue was re-dissolved in water and precipitated with a saturated solution of NH<sub>4</sub>PF<sub>6</sub>. The precipitate was filtered and dried in vacuum to afford the compound as PF<sub>6</sub><sup>-</sup> salt. <sup>1</sup>H NMR (400 MHz, CD<sub>3</sub>CN),  $\delta$  2.51 (s, 3H, CH<sub>3</sub>), 2.87 (t,  $J = 6.8$  Hz, 2H, CH<sub>2</sub>), 3.03 (t, 2H,  $J = 6.8$  Hz, CH<sub>2</sub>), 6.66-6.68 (d,  $J = 8.4$  Hz, 2H, Ph-H), 6.83-6.85 (d,  $J = 8.4$  Hz, 2H, Ph-H), 7.07-7.09 (m, 1H, bpy'-H), 7.20-7.22 (m, 1H, bpy'-H), 7.35-7.39 (m, 2H, bpy-H), 7.42-7.46 (m, 2H, bpy-H), 7.48-7.52 (m, 2H, bpy'-H), 7.66-7.76 (m, 4H, bpy-H), 8.00-8.09 (m, 4H, bpy-H), 8.29 (s, 1H, bpy'-H), 8.37 (s, 1H, bpy'-H), 8.56-8.60 (m, 4H, bpy-H). ESI-MS ( $m/z$  (%)): 849.0 (30) [ $M$ -PF<sub>6</sub><sup>-</sup>]<sup>+</sup>, 352.0 (100) [ $M$ -2PF<sub>6</sub><sup>-</sup>]<sup>2+</sup>; HRMS (ESI,  $m/z$ ): [ $M$ -PF<sub>6</sub><sup>-</sup>]<sup>+</sup> calcd for C<sub>39</sub>H<sub>34</sub>F<sub>6</sub>N<sub>6</sub>OPRu, 848.7616; found, 848.7651, [ $M$ -2PF<sub>6</sub><sup>-</sup>]<sup>2+</sup> calcd for C<sub>39</sub>H<sub>34</sub>N<sub>6</sub>ORu, 351.8984, found, 351.8995. Because CB[8] is completely insoluble in organic solvents, so the PF<sub>6</sub><sup>-</sup> salt was metathesized to the chloride salt for aqueous solution by using tetra-*n*-butylammonium chloride (Bu<sub>4</sub>NCl) dissolved in a minimal amount (< 10 ml) of acetone.

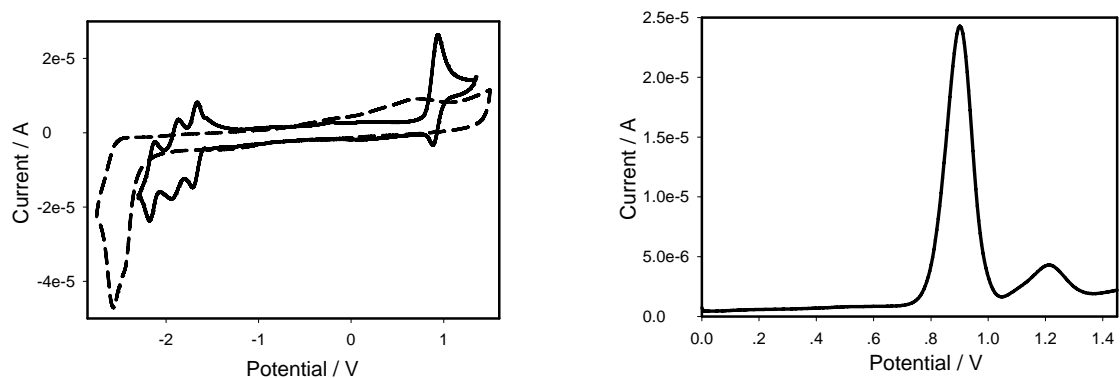

**S1.** Cyclic voltammograms of the Ru(bpy)<sub>3</sub> complex (left, solid line), phenol-bipyridine ligand (left, dashed line) and DPV of the Ru Complex **1** (right) in CH<sub>3</sub>CN. Electrolyte: 0.1 M N(n-C<sub>4</sub>H<sub>9</sub>)<sub>4</sub>PF<sub>6</sub>; Scan rate:  $\nu = 100 \text{ mV s}^{-1}$ .

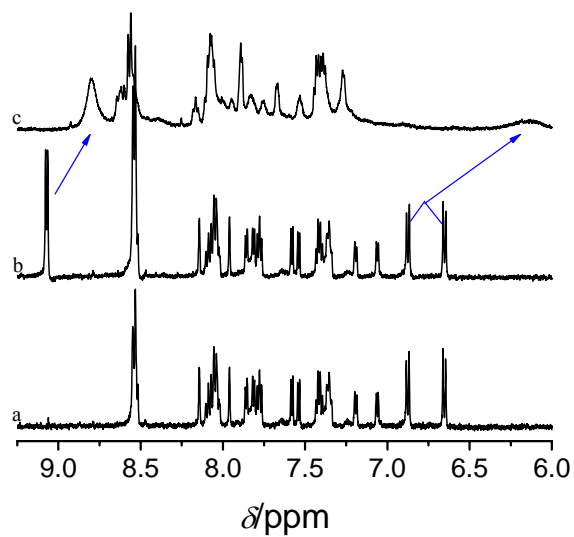

**S2.** <sup>1</sup>H NMR spectra (500 MHz, D<sub>2</sub>O) of complex **1** only (a), addition of 1 equiv of MV<sup>2+</sup> (b), addition of 1 equiv of CB[8] (c).

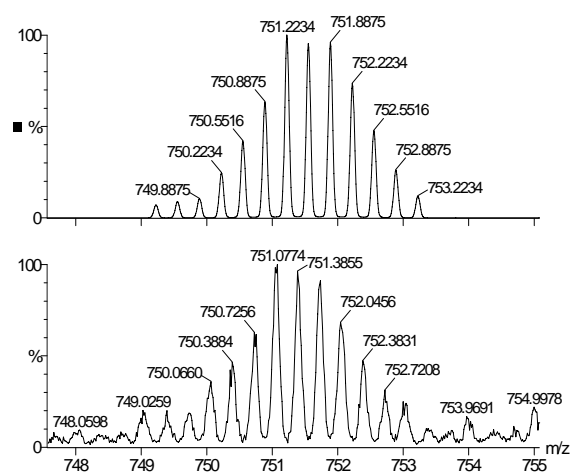

S3. Part of the MS spectrum for the 1:1:1 inclusion complex (bottom) and simulation (top).

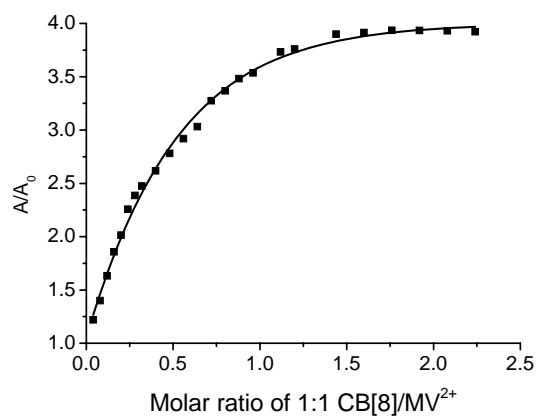

S4. The dependence of the absorbance of **1** (5  $\mu$ M) in aqueous solution at 460 nm on the increasing equiv of 1:1 MV<sup>2+</sup>/CB[8]

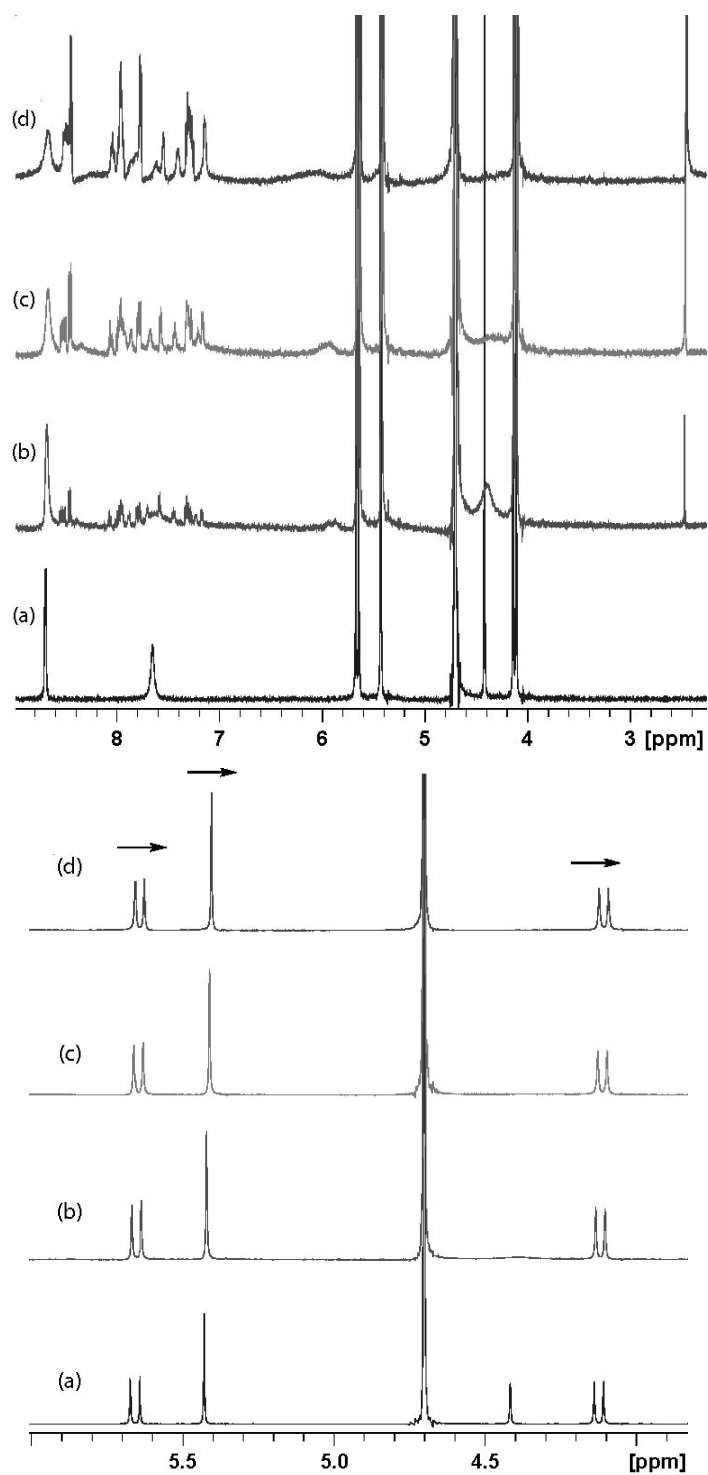

S5. <sup>1</sup>H NMR spectra to show (top) the dynamic inclusion of complex **1** into the MV<sup>2+</sup>/CB[8] complex as 0:1.0:1.0 (a), 0.5:1.0:1.0 (b), 1.0:1.0:1.0 (c) and 2.0:1.0:1.0 (d); and (down) the focus on the shift of the CB[8] peaks showing the dynamic interaction.

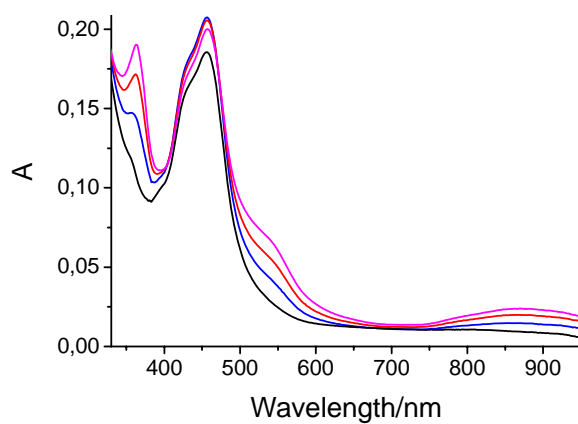

S6. Absorption spectra of complex **1** (10  $\mu\text{M}$ ), CB[8] (10  $\mu\text{M}$ ),  $\text{MV}^{2+}$  (10  $\mu\text{M}$ ) and 100  $\mu\text{M}$  TEOA, before (black), after 20 min (blue), after 40 min (red), and after 60 min (pink) light irradiation, respectively.

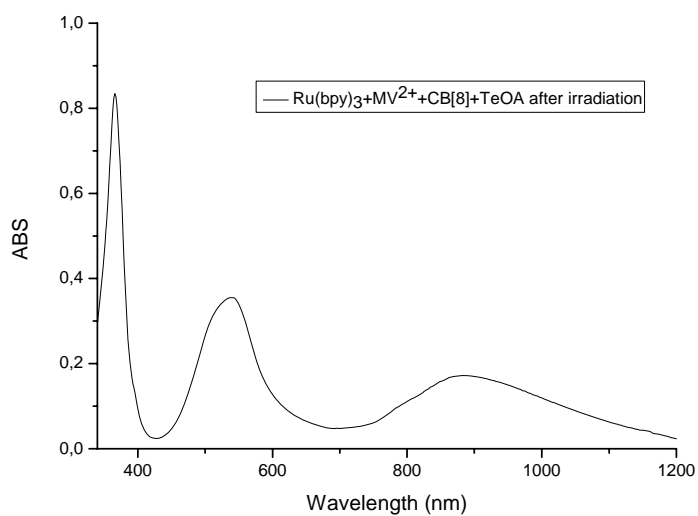

S7. Normalized absorption spectra of  $\text{Ru}(\text{bpy})_3^{2+}$  (10  $\mu\text{M}$ ), CB[8] (10  $\mu\text{M}$ ),  $\text{MV}^{2+}$  (10  $\mu\text{M}$ ) and 100  $\mu\text{M}$  TEOA after light irradiation.

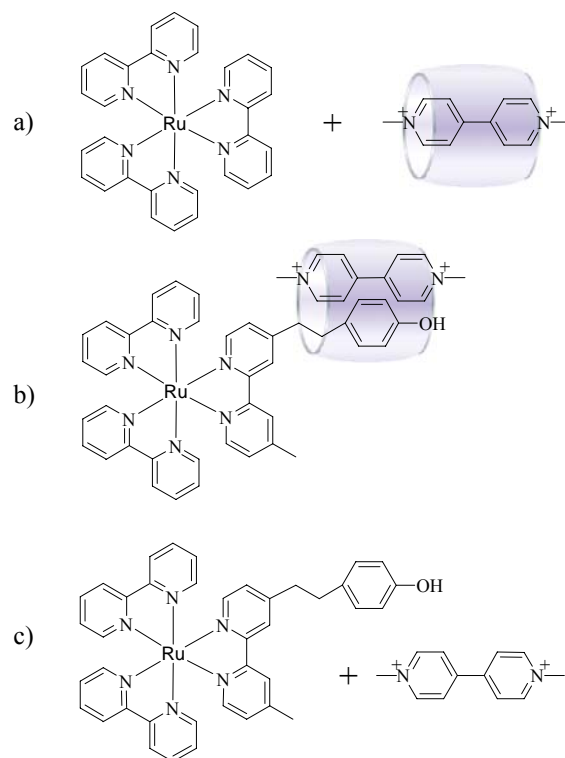

S8. Composition of the three systems a), b), and c) with addition of 10 equiv TEOA and irradiated for 15 min for  $^1\text{H}$  NMR measurements.

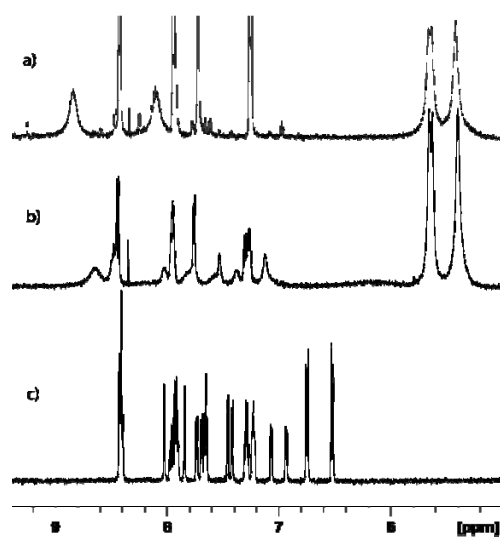

S9.  $^1\text{H}$  NMR of the three systems a), b), and c) after addition of 10 equiv TEOA and irradiated for 15 min.
